# Supplementary material
Source: MDPI journal article supplement (https://www.mdpi.com/2311-7524/8/7/616)
Supplement: s1 [file s1]

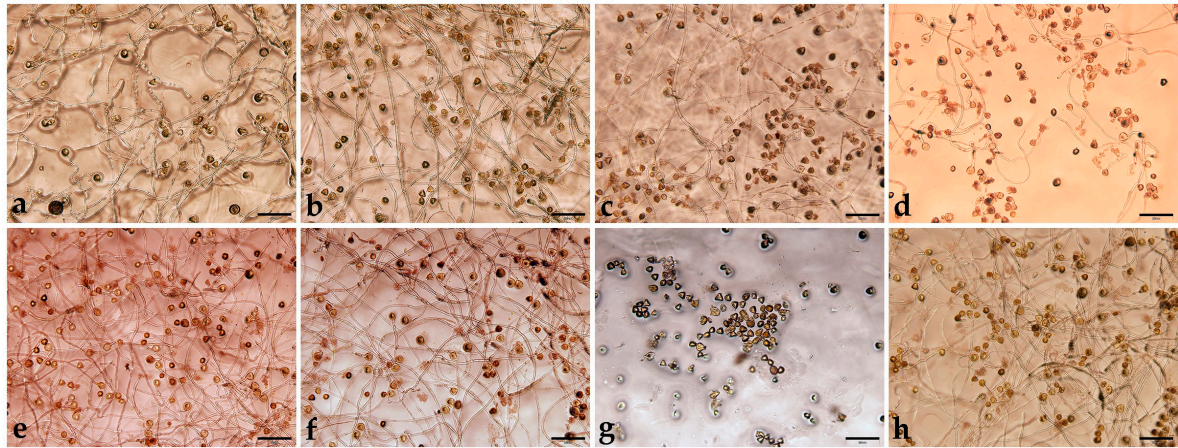

**Figure S1.** Pollen germination *in vitro*: (a) 'Čačanska Lepotica', fresh pollen; (b) 'Valerija', fresh pollen; (c) 'Valjevka', 3 months at 4 °C; (d) 'Valerija', 6 months at 4 °C; (e) 'Čačanska Lepotica', 9 months at -20 °C; (f) 'Čačanska Lepotica', 9 months at -80 °C; (g) 'Valerija', 12 months at 4 °C; (h) 'Čačanska Lepotica', 12 months at -196 °C. Scale bar = 200 μm.
